# Supplementary material
Source: publisher figshare collection journal article supplement (https://diabetesjournals.figshare.com/ndownloader/files/35777087)
Supplement: Supplementary file 1 [file 35777087]

# Supplementary Material

## Relation of incident type 1 diabetes to recent COVID-19 infection: cohort study using e-health record linkage in Scotland

Paul M McKeigue PhD 1 2 , Stuart McGurnaghan MSc 3 , Luke Blackburn PhD 3 , Louise E Bath PhD 4 , David A McAllister PhD 5 2 , Thomas M Caparrotta MB 3 4 , Sarah H Wild PhD 1 2 , Simon N Wood PhD 6 , Diane Stockton PhD 2 , Helen M Colhoun MD 3 2 \*

**1** Usher Institute, College of Medicine and Veterinary Medicine, University of Edinburgh, Teviot Place, Edinburgh EH8 9AG, Scotland.

**2** Public Health Scotland, Meridian Court, 5 Cadogan Street, Glasgow G2 6QE.

**3** Institute of Genetics and Cancer, College of Medicine and Veterinary Medicine, University of Edinburgh, Western General Hospital Campus, Crewe Road, Edinburgh EH4 2XU, Scotland.

**4** Royal Infirmary of Edinburgh, 51 Little France Crescent, Edinburgh EH16 4SA

**5** Institute of Health and Wellbeing, University of Glasgow, 1 Lilybank Gardens, Glasgow G12 8RZ

**6** School of Mathematics, James Clerk Maxwell Building, University of Edinburgh, EH9 3FD

### Construction of cohort at risk of incident diabetes from REACT-SCOT sample

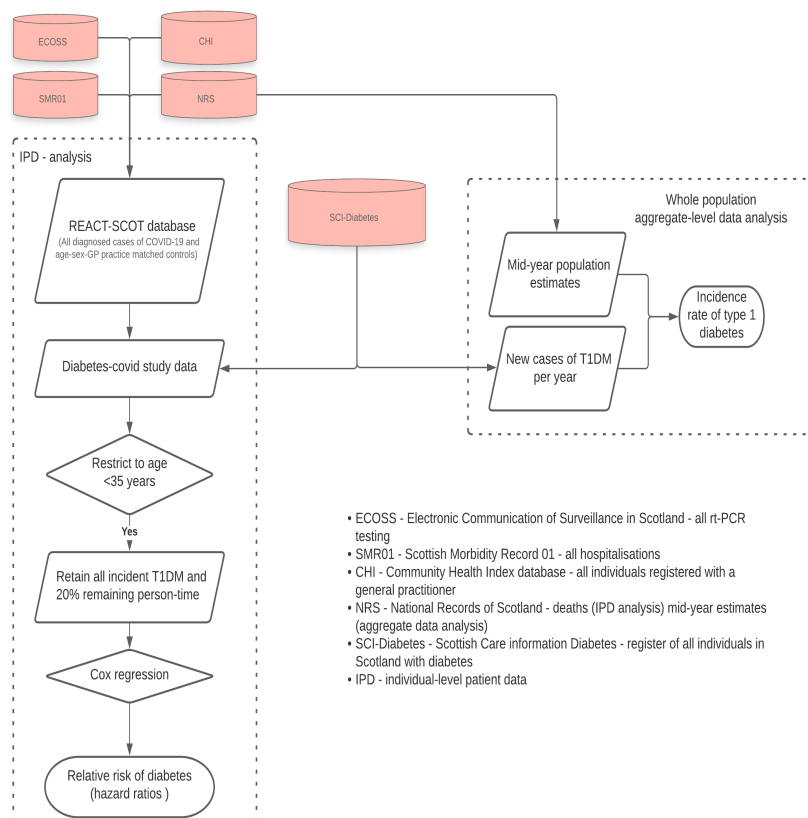

**Fig S1.** Flow chart of construction of cohort

## Validation of date of diagnosis against date of admission

As policy in Scotland is to admit immediately anyone with a suspected diagnosis of type 1 diabetes before age 16 years, the date of admission recorded in Scottish Morbidity Record (SMR) 01 can be used to validate the accuracy of date of diagnosis recorded in SCI-Diabetes. Table [S1](#) tabulates the difference between date of diagnosis of type 1 diabetes recorded in SCI-Diabetes and the date of first admission for diabetes recorded in SMR01. In those aged less than 16 years, 86% (348 of 403) of dates of diagnosis recorded in SCI-Diabetes were within two days of the date of first admission for diabetes. For cases with date of encashed insulin prescription, date of admission for diabetes or date of outpatient consultation earlier than the date of diagnosis recorded in SCI-Diabetes, the date of diagnosis was recoded as the earliest date of these dates.

**Table S1.** Days from first admission for diabetes to date of diagnosis of Type 1 diabetes recorded in SCI-Diabetes, by age at entry to cohort

| Date of diagnosis in SCI-Diabetes | Age at entry (years) |           |
|-----------------------------------|----------------------|-----------|
|                                   | <16                  | 16 to <35 |
| 3 or more days before admission   | 36 (9%)              | 23 (11%)  |
| Within 2 days                     | 368 (88%)            | 161 (79%) |
| 3 or more days after admission    | 12 (3%)              | 19 (9%)   |
| Total                             | 416                  | 203       |

SMR01 hospital admission records were not available for the most recently-diagnosed cases, as these records are updated only once every 1-2 months

## Relation of date of SARS-CoV-2 tests to date of diagnosis of type 1 diabetes

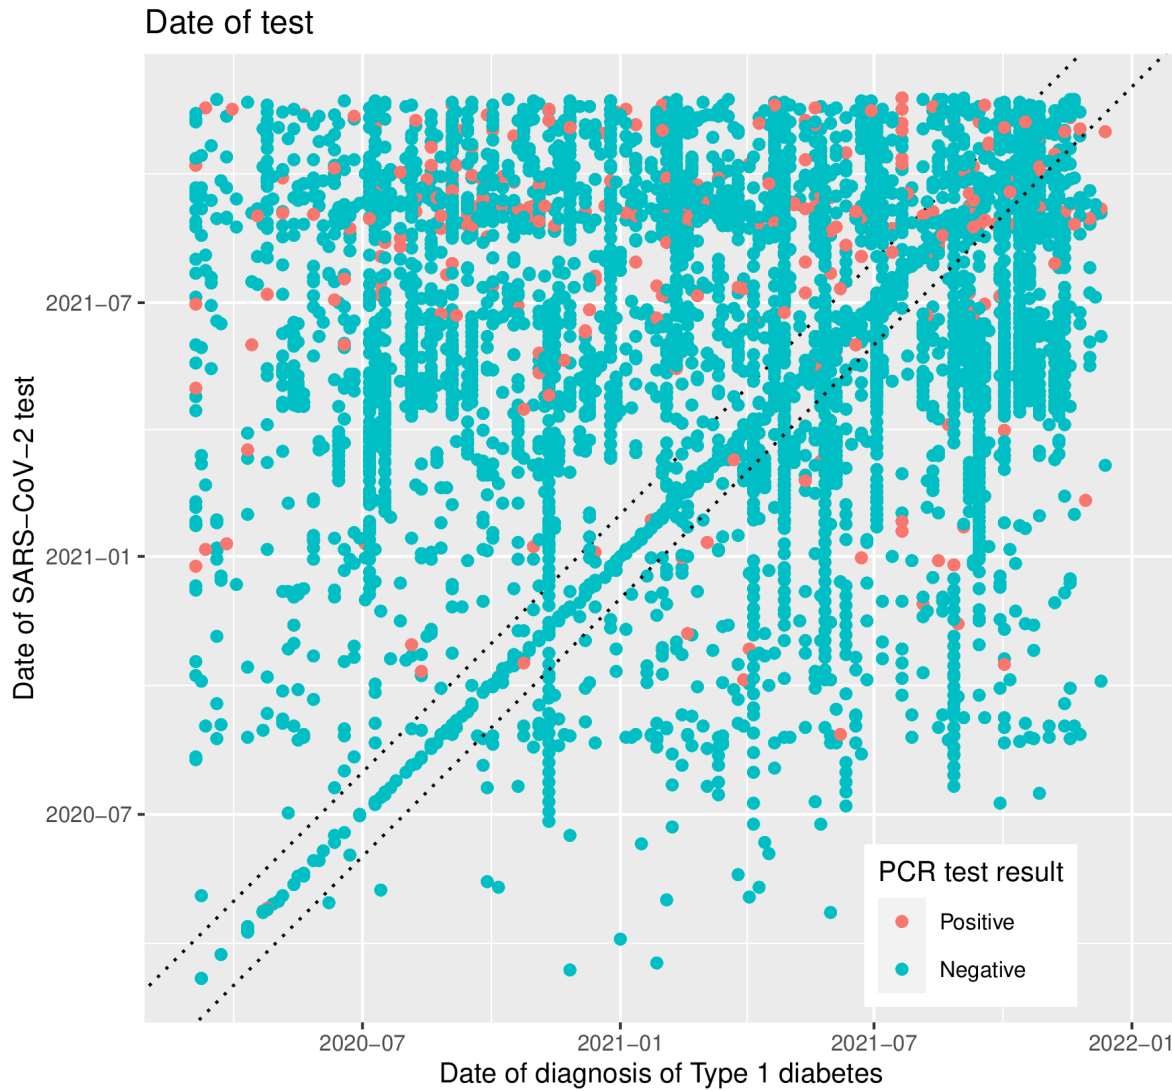

**Fig S2.** Relation of date of SARS-CoV-2 tests to date of diagnosis of type 1 diabetes. The dotted lines bound the interval from 10 days before to 10 days after diagnosis

## Modelling seasonal and calendar time effects on type 1 diabetes incidence

The R package `mgcv` [10] was used to fit a generalized additive model with Poisson likelihood to the counts of daily cases by age band from 2015 to 2021. The terms in the model were the intercept, an indicator for weekend versus weekday, a smoothed term for seasonality as a cyclic cubic spline fitted to the week of diagnosis (encoded as an integer from 1 to 52), and a smoothed term for calendar time as a thin plate spline fitted to the date of diagnosis. These smoothed terms were specified separately for each of the two age bands, and are defined to have zero mean within each age band. The model-fitting routine chooses the effective number of degrees of freedom for each spline by minimizing the unbiased risk estimator (penalized deviance). In those aged 0-14 years at diagnosis, the effective number of degrees of freedom was 7.2 for the seasonality effect and 7.3 for the calendar time effect. In those aged 15-34 years, the effective number of degrees of freedom was 7.2 for seasonality and 1.3 for calendar time (nearly equivalent to a linear effect). Fig. 3 shows the fitted curves for seasonality (panel a) and calendar time (panel b) by age band. Though the seasonality effect in those aged 15-34 is not statistically significant when tested in isolation, the peaks and troughs of the curve estimated in this age group coincide with those of the curve fitted to the 0-14 age group.
